# Supplementary material for: Characterisation of morphological, antimicrobial and leaching properties of in situ prepared polyurethane nanofibres doped with silver behenate
Source: Royal Society of Chemistry journal article supplement (doi:10.1039/c6ra03614g), 2016-01-01
Supplement: c6ra03614g1.pdf [file c6ra03614g1.pdf]

1 **Supplementary section**

2

3 **Characterisation of Morphological, Antimicrobial and Leaching Properties of in-situ prepared**

4 **Polyurethane Nanofibres Doped with Silver Behenate**

5

6 Jan Dolina<sup>1</sup>, Lukáš Dvořák<sup>1\*</sup>, Tomáš Lederer<sup>1</sup>, Taťana Vacková<sup>2</sup>, Šárka Mikmeková<sup>3</sup>, Miroslav Šlouf<sup>2</sup> and

7 Miroslav Černík<sup>1</sup>

8

9 <sup>1</sup> *Centre for Nanomaterials, Advanced Technologies and Innovation, Technical University of Liberec,*

10 *Studentská 2, 461 17, Liberec, Czech Republic*

11 <sup>2</sup> *Institute of Macromolecular Chemistry, Academy of Sciences of the Czech Republic, v.v.i., Heyrovsky*

12 *Sq. 2, 162 06, Prague 6, Czech Republic*

13 <sup>3</sup> *Institute of Scientific Instruments of the Academy of Sciences of the Czech Republic, v.v.i.,*

14 *Královopolská 147, 612 64, Brno, Czech Republic*

15

16 \* Corresponding author (E-mail: lukas.dvorak@tul.cz; Tel.: 00420 485 353 668)

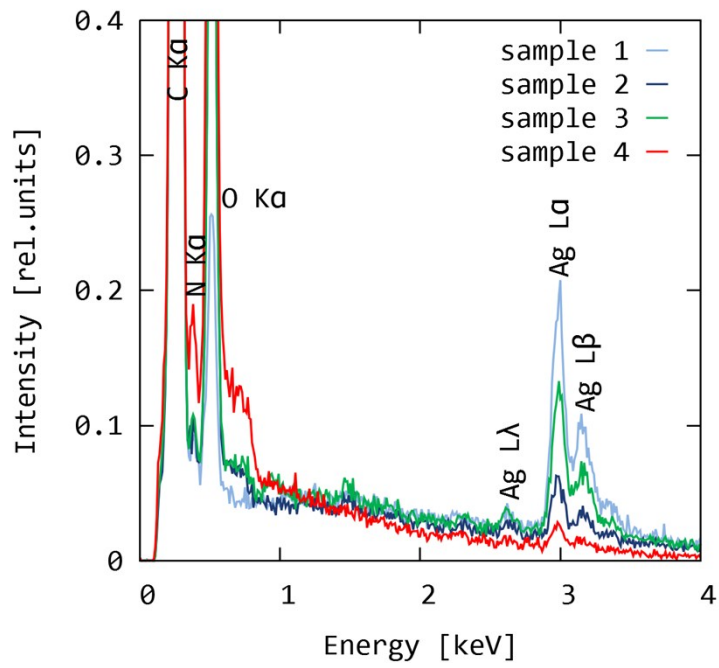

17

18 **Figure S1:** EDX spectra for samples 1-4.

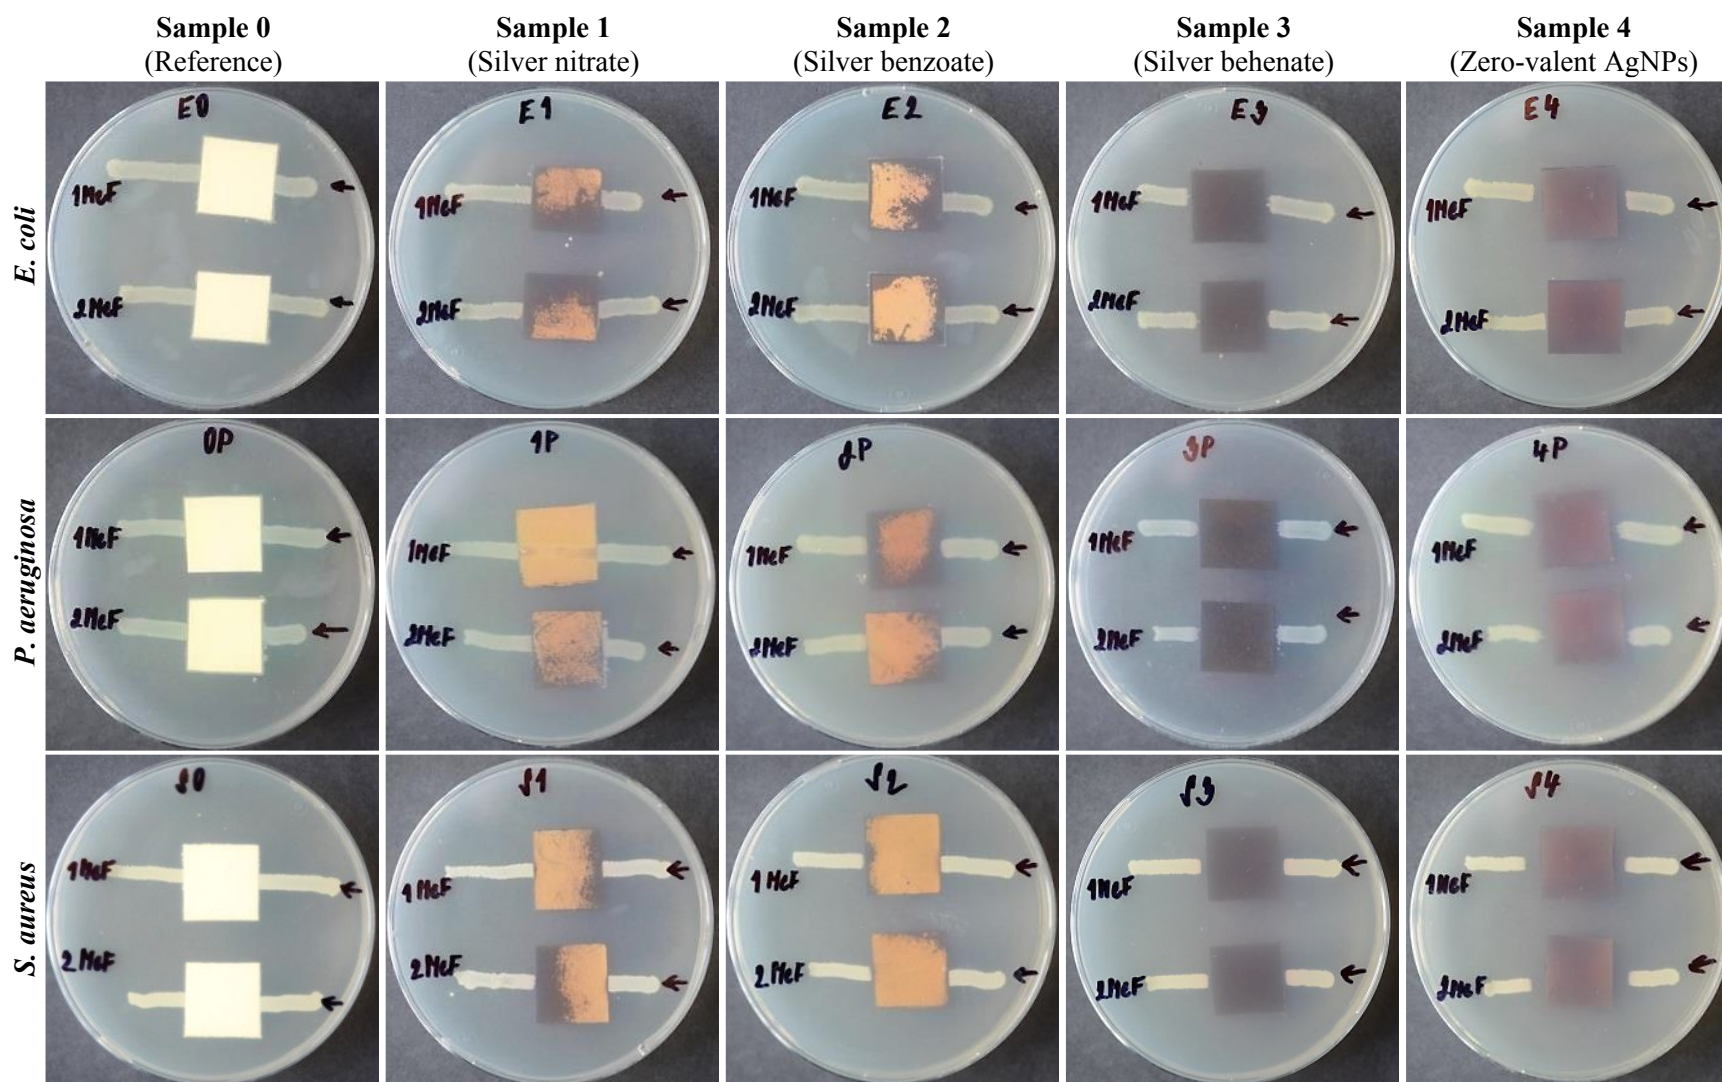

19

20 **Figure S2:** Plate-count agars at the end of the parallel streak test (AATCC 147 method) for samples 0-4 using three different bacterial strains and

21 two concentrations (1 and 2 McF).
